# Supplementary material for: Plasmid Interactions Can Improve Plasmid Persistence in Bacterial Populations
Source: Front Microbiol. 2020 Aug 31;11:2033. doi: 10.3389/fmicb.2020.02033 (PMC7487452; doi:10.3389/fmicb.2020.02033)
Supplement: Supplementary file 1 [file Data_Sheet_1.xlsx]

## Sheet: Supp.TableS2
method

## Sheet: Supp.TableS3
method

## Sheet: Supp.TableS4
method

## Sheet: Supp.TableS5
method

## Sheet: Supp.TableS6
method

## Sheet: Supp.TableS7
method

## Sheet: Supp.TableS8
method

## Sheet: Supp.TableS9
method

## Sheet: Supp.TableS10
method

## Sheet: Supp.TableS11
method

[truncated: 6 more sheets: Supp.TableS12, Supp.TableS13, Supp.TableS14, Supp.TableS15, Supp.TableS16, Supp.TableS17]
